# Supplementary material for: Adhesion of the mucilage envelope of Ocimum basilicum seeds probed by sum frequency generation spectroscopy
Source: Royal Society of Chemistry journal article supplement (doi:10.1039/d4sm01057d), 2024-11-26
Supplement: d4sm01057d1.pdf [file d4sm01057d1.pdf]

## Supporting Information:

### Adhesion of the mucilage envelope of *Ocimum basilicum* seeds probed by sum frequency generation spectroscopy

Mette H. Rasmussen<sup>1</sup>, Mikkel Bregnhøj<sup>1</sup>, Agnieszka Kreitschitz<sup>2,3</sup>

Stanislav N. Gorb<sup>3</sup> and Tobias Weidner<sup>1,\*</sup>

<sup>1</sup> Department of Chemistry, Aarhus University, 8000 Aarhus C, Denmark

<sup>2</sup> Department of Plant Developmental Biology, University of Wrocław, ul. Kanonia 6/8, 50-328, Wrocław, Poland

<sup>3</sup> Functional Morphology and Biomechanics, Zoological Institute, Kiel University, 24118 Kiel, Germany

\*Corresponding author email address: [weidner@chem.au.dk](mailto:weidner@chem.au.dk)

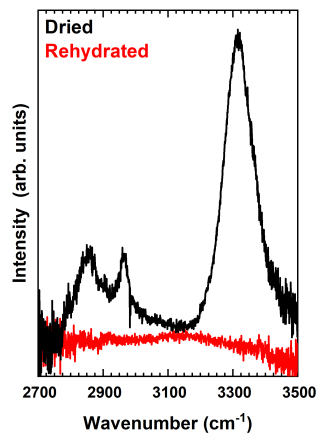

Figure S1: SFG spectra for the mucilage envelope from the *Ocimum Basilicum* (OC) adhering to the CaF2 interface in the dried state (Black) and in the rehydrated state (Red).

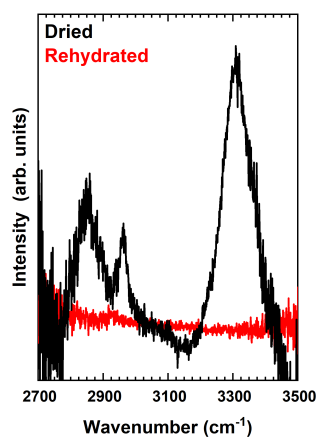

Figure S2: SFG spectra for the mucilage envelope from the *Ocimum Basilicum* (OC) adhering to the PS interface in the dried state (Black) and in the rehydrated state (Red).

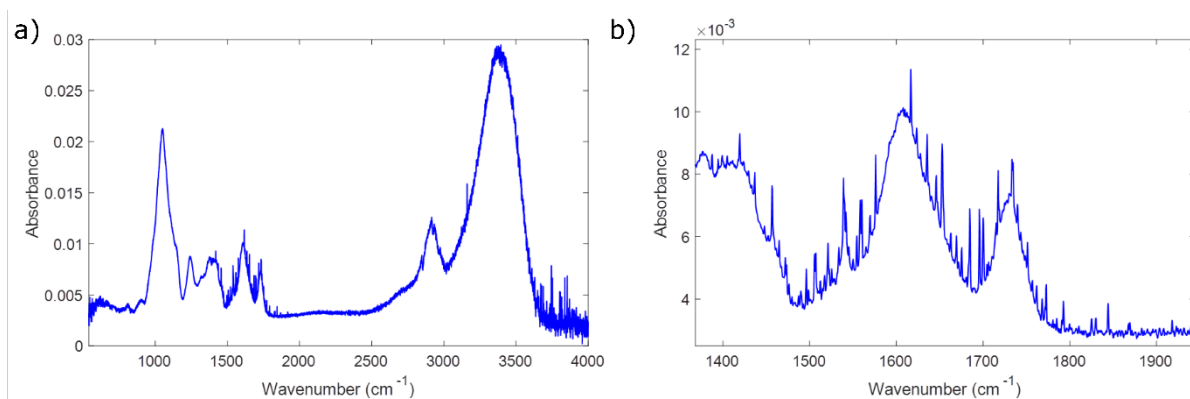

Figure S3: ATR-FTIR spectra of hydrated *Ocimum Basilicum* seeds. The sample was measured by dropcasting 50  $\mu\text{L}$  of Milli-Q water onto 10 seeds on the ATR crystal of the spectrometer and letting it dry for 3 hours. The sharp bands are from residual water which has not been completely purged. (a) Overview spectrum. (b) Detailed spectrum of the C=O region.

Table 1:

The Fresnel factors are calculated based on the data in the table. The calculated local field corrections are  $F_{SSP,PS} = 0.7557$  and the  $F_{SSP,CaF_2} = 0.6066$ . The Fresnel factors are calculated assuming the beams are transmitted through the PS or the  $\text{CaF}_2$ . The local field correction is calculated assuming an interfacial refractive index as an average between the cellulose and the PS or  $\text{CaF}_2$  interface. The incoming angle for the visible beam is  $30^\circ$  and the angle for the incoming IR beam is  $40^\circ$ . The correction does not significantly change the results and does therefore not affect the main conclusion in the paper. The refractive indices are found in the following references for cellulose<sup>1</sup>, PS<sup>2</sup> and  $\text{CaF}_2$ <sup>3</sup>.

|                                              | $\omega_{SF}$         | $\omega_{VIS}$ | $\omega_{IR}$ |
|----------------------------------------------|-----------------------|----------------|---------------|
| $\lambda$ (nm)                               | 648                   | 804            | 3333          |
| $\omega$ (cm <sup>-1</sup> )                 | 15438                 | 12438          | 3000          |
| $n_{PS}$                                     | 1.5864                | 1.5766         | 1.5617        |
| $n_{CaF_2}$                                  | 1.4326                | 1.4305         | 1.4155        |
| $n_{Cellulose}$                              | 1.4613 (approximated) | 1.4641         | 1.4378        |
| $n'_{\text{average PS-cellulose}}$           | 1.5262                | 1.5204         | 1.5115        |
| $n'_{\text{average CaF}_2\text{-cellulose}}$ | 1.4493                | 1.4473         | 1.4384        |

## Bibliography

- 1 N. Sultanova, S. Kasarova and I. Nikolov, *Acta Phys. Pol. A*, 2009, 116, 585–587.
- 2 X. Zhang, J. Qiu, J. Zhao, X. Li and L. Liu, *Journal of Quantitative Spectroscopy and Radiative Transfer*, 2020, 252, 107063.
- 3 H. H. Li, *Journal of Physical and Chemical Reference Data*, 1980, 9, 161–290.
